# Supplementary material for: A new Dy-doped BaCeO3–BaZrO3 proton-conducting material as a promising electrolyte for reversible solid oxide fuel cells
Source: Royal Society of Chemistry journal article supplement (doi:10.1039/c6ta06414k), 2016-01-01
Supplement: c6ta06414k1.pdf [file c6ta06414k1.pdf]

## Supplementary information

### **New Dy-doped BaCeO<sub>3</sub>–BaZrO<sub>3</sub> proton-conducting material as a promising electrolyte for reversible solid oxide fuel cells**

Julia Lyagaeva,<sup>a</sup> Nikolay Danilov,<sup>a</sup> Gennady Vdovin,<sup>a</sup> Junfu Bu,<sup>b</sup>

Dmitry Medvedev,<sup>ac</sup> Anatoly Demin<sup>a</sup> and Panagiotis Tsiakaras<sup>ad</sup>

<sup>a</sup> Laboratory of Electrochemical Devices Based on Solid Oxide Proton Conductors, Institute of High Temperature Electrochemistry, 620137 Yekaterinburg, Russia.

<sup>b</sup> Department of Materials, University of Oxford, Parks Road, OX1 3PH Oxford, United Kingdom

<sup>c</sup> Ural Federal University, 620002 Yekaterinburg, Russia

<sup>d</sup> Laboratory of Alternative Energy Conversion Systems, Department of Mechanical Engineering, School of Engineering, University of Thessaly, Pedion Areos, 383 34 Volos, Greece

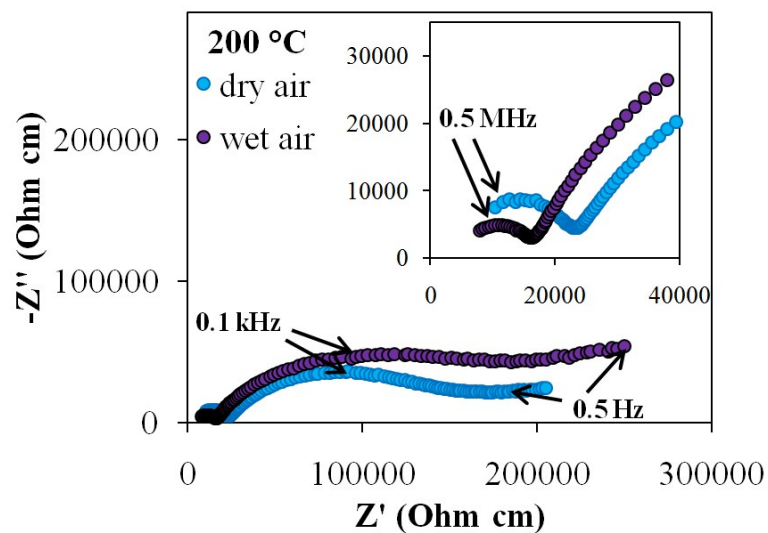

**Figure S1** The examples of impedance spectra for BaCe<sub>0.5</sub>Zr<sub>0.3</sub>Dy<sub>0.2</sub>O<sub>3-δ</sub> samples obtained in dry and wet air at 200 °C. An equivalent circuit consisting of three RQ elements in series (where R represents a resistance and Q represents a constant phase element) was used for the interpretation of the impedance spectra.

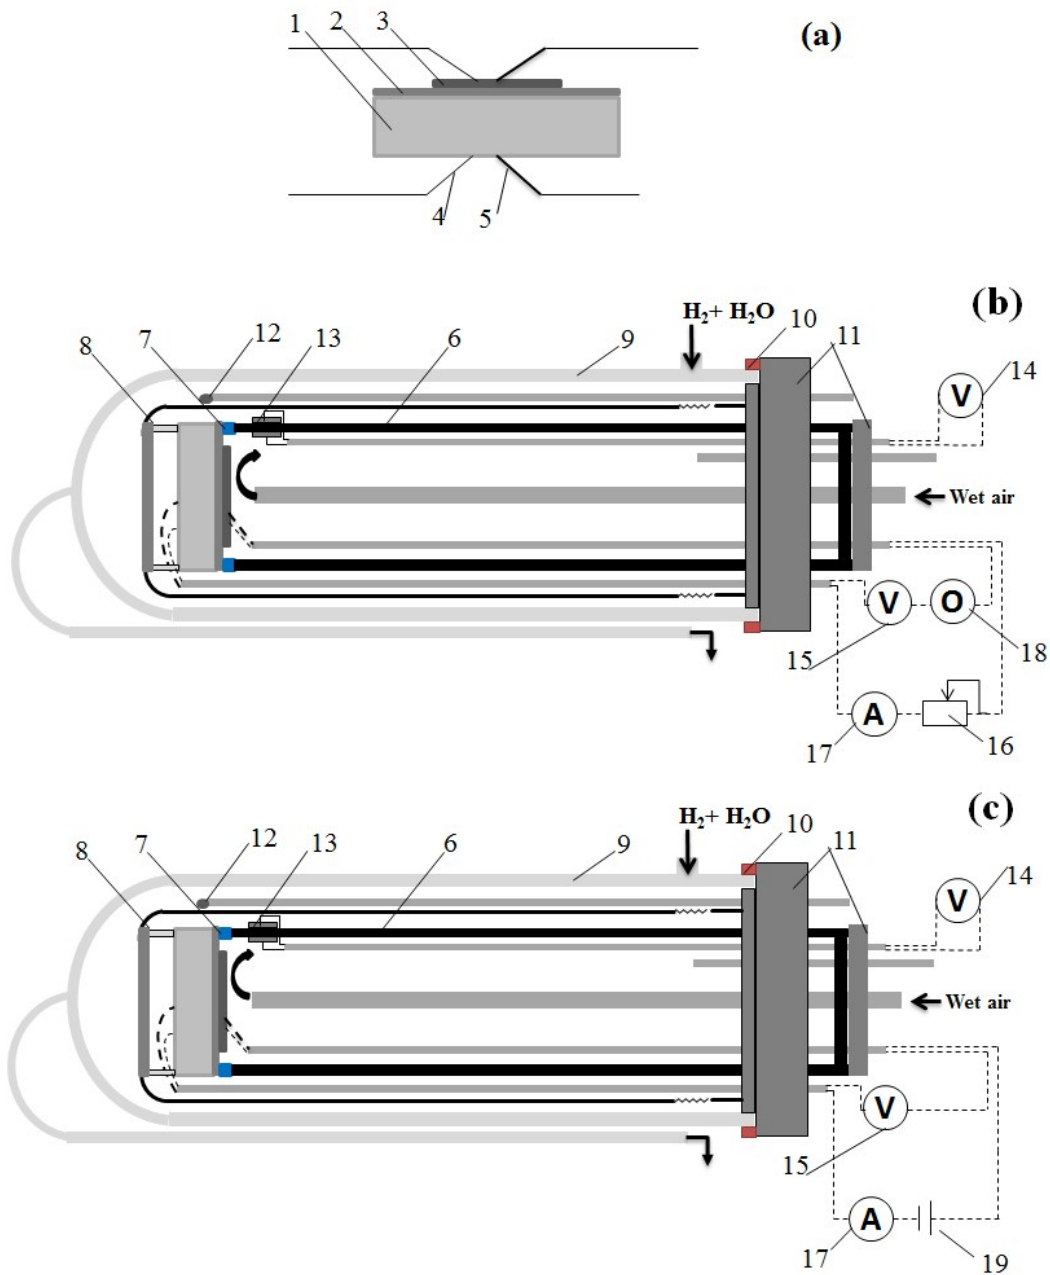

**Figure S2** The principal schemes of unit cell (a) and electrochemical systems for cell's characterization SOFC (b) and SOEC (c) modes: 1 – supported and functional layers, 2 – electrolyte, 3 – cathode and collector layers, 4 and 5 – potential and current platinum wires, 6 – YSZ supported tube, 7 – high-temperature glass sealant, 8 – press part, 9 – quartz cell, 10 – low temperature polymeric sealant, 11 – fluoroplastic probes, 12 – thermocouple, 13 – electrochemical oxygen sensor, 14 – voltmeter, 15 – voltmeter, 16 – resistance box, 17 – amperometer, 18 – oscilloscope, 19 – current source

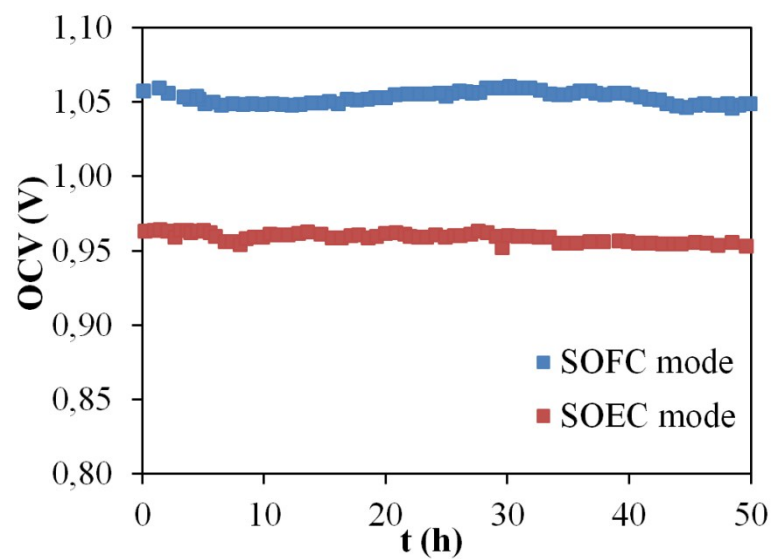

**Figure S3** Time dependence of OCV values depending on time at 600 °C.
